# Supplementary material for: SMoLR: visualization and analysis of single-molecule localization microscopy data in R
Source: Springer Nature journal article supplement (doi:10.1186/s12859-018-2578-3), 2019-01-15

A

```
> dynamicplot(locdata)
Loading required package: shiny
Loading required package: ggplot2

Listening on http://127.0.0.1:5140
```

Calling Shiny app from R  
Running in web browser

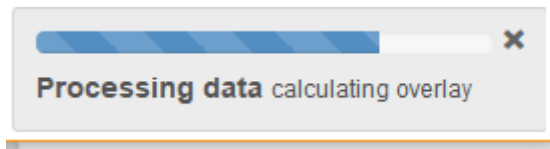

B

Scatter plot

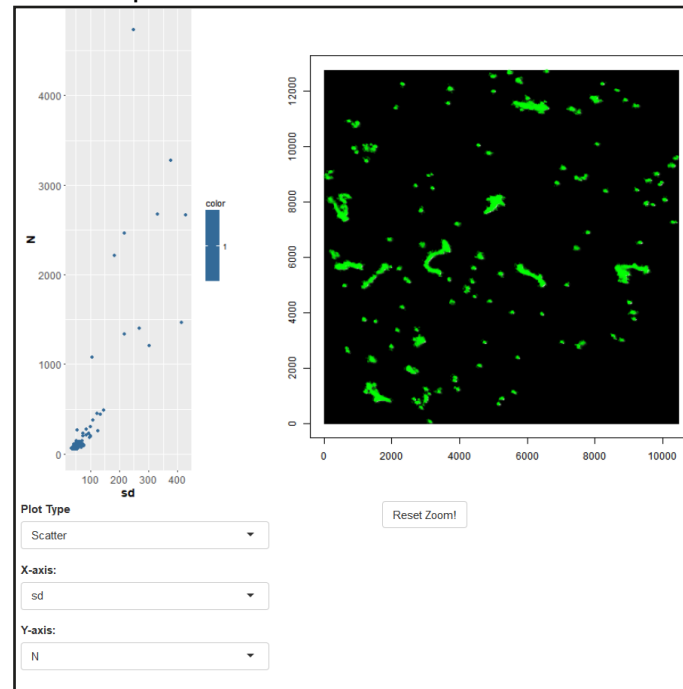

C

Histogram

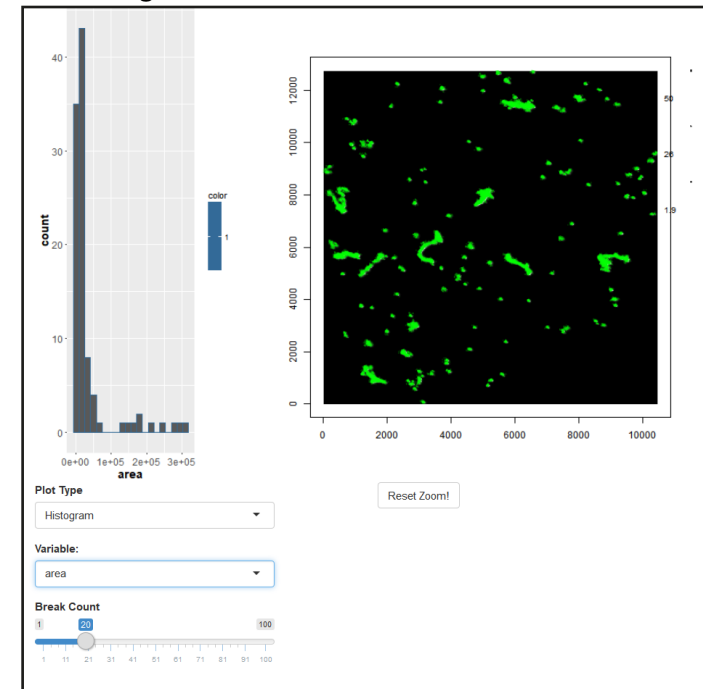

D

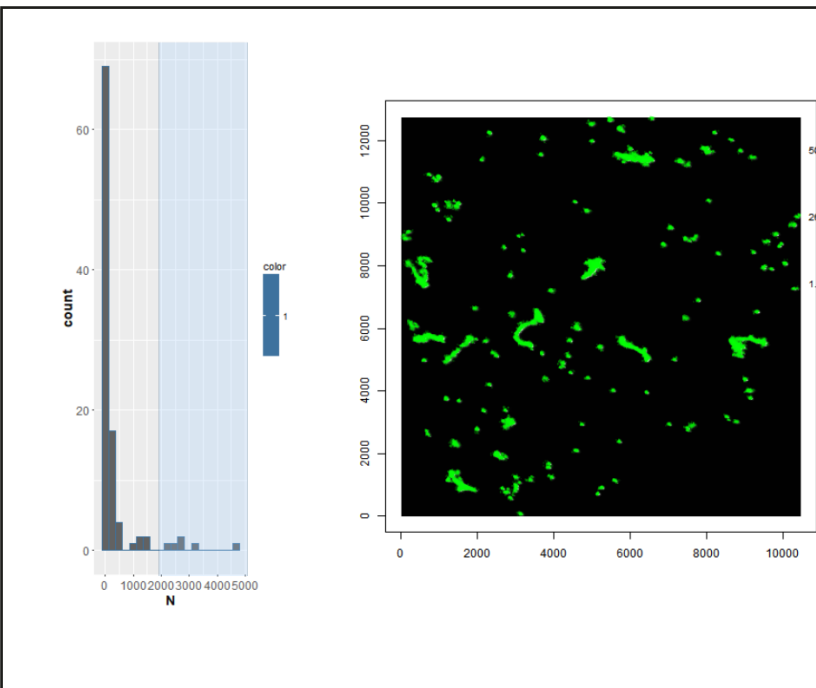

Select clusters  
based on statistics

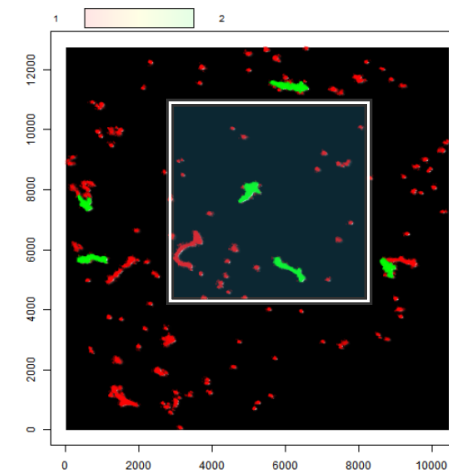

Zoom

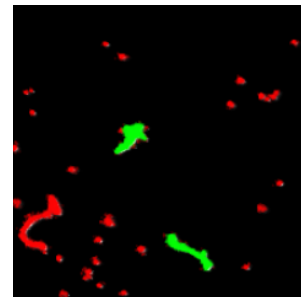

Supplement: 12859_2018_2578_MOESM1_ESM.pdf [file 12859_2018_2578_MOESM1_ESM.pdf]
