# Supplementary material for: SMoLR: visualization and analysis of single-molecule localization microscopy data in R
Source: Springer Nature journal article supplement (doi:10.1186/s12859-018-2578-3), 2019-01-15
Supplement: 12859_2018_2578_MOESM2_ESM.pdf [file 12859_2018_2578_MOESM2_ESM.pdf]

A

Test Data

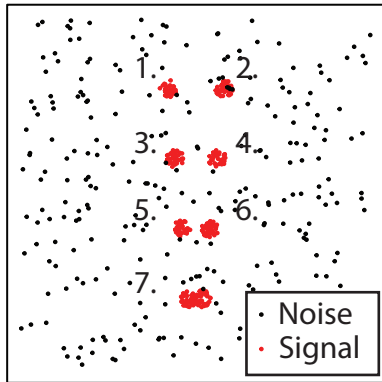

B

KDE

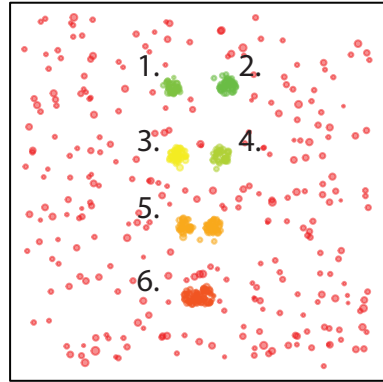

6/7 clusters detected  
 0 false positive clusters  
 5% noise incorporated  
 100% clustered localizations  
 incorporated

C

DBSCAN

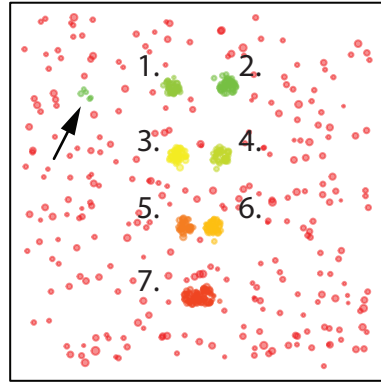

7/7 clusters detected  
 1 false positive cluster  
 6.7% noise incorporated  
 100% clustered localizations  
 incorporated

D

Voronoi

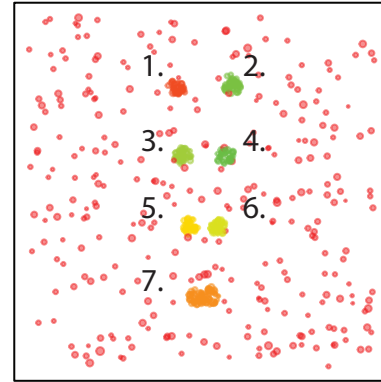

7/7 clusters detected  
 0 false positive clusters  
 2.7% noise incorporated  
 98.4% clustered localizations  
 incorporated

E

Bayesian clustering

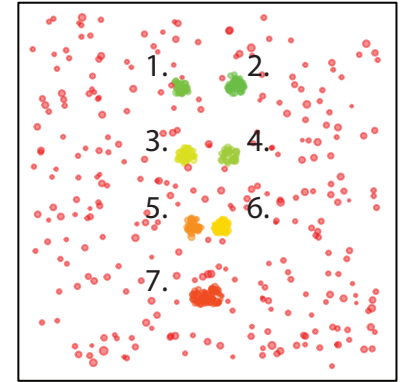

7/7 clusters detected  
 0 false positive clusters  
 3.3% noise incorporated  
 99.4% clustered localizations  
 incorporated
